# Supplementary material
Source: ML conference proceedings conference paper supplement (https://openaccess.thecvf.com/content/CVPR2025/html/Yan_A_Simple_Data_CVPR_2025_paper.html)
Supplement: Supplementary file 1 [file Yan_A_Simple_Data_CVPR_2025_supplemental.pdf]

# A Simple Data Augmentation for Feature Distribution Skewed Federated Learning

## Supplementary Material

### A. More Details

#### A.1. Details of Dataset

There are 4 subsets for Office-Caltech-10 [4] and 6 subsets for DomainNet [28] and ProstateMRI [24]. These subsets from different domains, incurring feature distribution skew. Following previous work [22, 48], we employ the subsets as clients when conducting experiments on each dataset. Therefore, the number of clients for Office-Caltech-10, DomainNet, and ProstateMRI is 4, 4 and 6, respectively. Both Office-Caltech-10 and DomainNet consist of 10 classes each. ProstateMRI, on the other hand, is a binary segmentation task involving lesions and background. The number of samples in `train`, `val` and `test` for each client can be seen in Table 6.

#### A.2. Details of Baselines

There are some important hyper-parameters for some FL methods. For instance, the FedProx and FedProto have  $\mu$  to control the contribution of an additional loss function. We empirically set  $\mu$  to 0.001 for FedProx and 1 for FedProto on all datasets. Besides, FedAvgM has a momentum hyper-parameter to control the momentum update of the global model parameters, which is set to 0.9 for two image classification datasets and 0.01 for ProstateMRI. FedMix also has two hyper-parameters, *i.e.*, the batch size of mean images and  $\lambda$  to control images fusing. We adopted the reported configuration from the original paper. The batch size is set to 5 and  $\lambda$  is set to 0.1.

### B. More Experiments

#### B.1. Stability of Our method

In this section, we further evaluate the stability of our method. To this end, we conducted two additional independent trials with different random seeds and reported the mean and standard derivation (std) of the average result of all clients across the three trials. Besides, we also performed

statistical significance testing by conducting paired t-test between each method and our method, and we reported the corresponding p-value.

Tables 7 and 8 shows the results on three datasets, indicating FedRDN achieves a higher mean while maintaining a low std on three datasets compared to other methods. This demonstrates that the randomness introduced by Eq. (7) in FedRDN does not lead to performance instability. By statistical significance testing, we observed that the p-values across three datasets are less than 0.05, indicating that the performance improvement of FedRDN over other methods is significant.

Table 7. **Results of Stability** on Office-Caltech-10 [4] and DomainNet [28]. We report the mean and standard derivation of the average result of all clients across the three trials: (mean $\pm$ std). Besides, we perform paired t-test between each method and our method, and reported the corresponding p-value.

| Method          | Office-Caltech-10                |         | DomainNet                        |         |
|-----------------|----------------------------------|---------|----------------------------------|---------|
|                 | Accuracy                         | p-value | Accuracy                         | p-value |
| FedAvg          | 61.74 $\pm$ 0.76                 | 0.0001  | 42.66 $\pm$ 1.14                 | 0.0128  |
| + <i>norm</i>   | 61.55 $\pm$ 0.40                 | 0.0031  | 42.64 $\pm$ 1.55                 | 0.0160  |
| + <i>FedMix</i> | 63.22 $\pm$ 1.08                 | 0.0028  | 43.05 $\pm$ 1.43                 | 0.0047  |
| + <b>FedRDN</b> | <b>69.18<math>\pm</math>0.63</b> | -       | <b>43.94<math>\pm</math>1.35</b> | -       |

Table 8. **Results of Stability** on ProstateMRI [24]. We report the mean and standard derivation of the average result of all clients across the three trials: (mean $\pm$ std). Besides, we perform paired t-test between each method and our method, and reported the corresponding p-value.

| Method          | ProstateMRI                      |         |
|-----------------|----------------------------------|---------|
|                 | Accuracy                         | p-value |
| FedAvg          | 90.44 $\pm$ 0.99                 | 0.0237  |
| + <i>norm</i>   | 90.60 $\pm$ 0.94                 | 0.0035  |
| + <b>FedRDN</b> | <b>92.19<math>\pm</math>0.86</b> | -       |

Table 6. **The number of samples in** `train`, `val` and `test` for each client on three datasets.

| Samples | Office-Caltech-10 [4] |        |      |        | DomainNet [28] |           |          |           |      |        | ProstateMRI [24] |    |       |     |       |     |
|---------|-----------------------|--------|------|--------|----------------|-----------|----------|-----------|------|--------|------------------|----|-------|-----|-------|-----|
|         | Amazon                | Catech | DSLR | WebCam | Clipart        | Infograph | Painting | Quickdraw | Real | Sketch | BIDMC            | HK | I2CVB | BMC | RUNMC | UCL |
| train   | 459                   | 538    | 75   | 141    | 672            | 840       | 791      | 1280      | 1556 | 708    | 156              | 94 | 280   | 230 | 246   | 105 |
| val     | 307                   | 360    | 50   | 95     | 420            | 525       | 494      | 800       | 972  | 442    | 52               | 31 | 93    | 76  | 82    | 35  |
| test    | 192                   | 225    | 32   | 59     | 526            | 657       | 619      | 1000      | 1217 | 554    | 52               | 31 | 93    | 76  | 82    | 35  |
